# Supplementary material for: Attenuation of Experimental Autoimmune Hepatitis in Mice with Bone Mesenchymal Stem Cell-Derived Exosomes Carrying MicroRNA-223-3p
Source: PubMed Central journal article supplement — Mol Cells. 2019 Dec 12;42(12):906–18. doi: 10.14348/molcells.2019.2283 (PMC6939658; doi:10.14348/molcells.2019.2283), 2019-12-12
Supplement: molce-42-906_supple.pdf [file molce-42-906_supple.pdf]

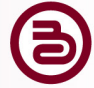**Supplementary Table S1.** The sequences of forward and reverse primers

| Species | Gene name    | Forward primer (5'→3') | Reverse primer (5'→3') | Annealing temperatures (°C) |
|---------|--------------|------------------------|------------------------|-----------------------------|
| Mouse   | <i>IL-1β</i> | ATTGTGGCTGTGGAGAAG     | AAGATGAAGGAAAAGAAGGTG  | 60                          |
| Mouse   | <i>IL-6</i>  | ATTCCTCTGGTCTTCTGG     | CTGGCTTTGTCTTCTTGT     | 60                          |
| Mouse   | <i>IL-10</i> | GACAACATACTGCTAACCGA   | CTGGGGCATCACTTCTAC     | 60                          |
| Mouse   | <i>IL-17</i> | CAGTTCGTGCTATTGATTTTC  | CCCCTTACACCTTCTTTTC    | 60                          |
| Mouse   | <i>Stat3</i> | TCTACCTCTACCCCGACATT   | ACTCAAACCTGCCCTCCTG    | 60                          |
| Mouse   | <i>GAPDH</i> | AAGAAGGTGGTGAAGCAGG    | GAAGGTGGAAGAGTGGGAGT   | 60                          |
